# Supplementary material for: Thermally resistant UV-curable epoxy–siloxane hybrid materials for light emitting diode (LED) encapsulation
Source: Royal Society of Chemistry journal article supplement (doi:10.1039/c2jm16355a), 2012-01-01
Supplement: c2jm16355a.pdf [file c2jm16355a.pdf]

# Thermally Resistant UV-Curable Epoxy-Siloxane Hybrid Materials for Light Emitting Diode (LED) Encapsulation

SeungCheol Yang,<sup>a</sup> Seung-Yeon Kwak,<sup>a</sup> JungHo Jin,<sup>a</sup> Joon-Soo Kim,<sup>a</sup> Yongwon Choi,<sup>b</sup>  
Kyung-Wook Paik<sup>b</sup> and Byeong-Soo Bae<sup>\*a</sup>

<sup>a</sup> *Laboratory of Optical Materials and Coating (LOMC), Department of Materials Science and Engineering, Korea Advanced Institute of Science and Technology (KAIST), Daejeon 305-701, Republic of Korea. Fax: 82 42 350 3310; Tel: 82 42 350 4119; E-mail: bsbae@kaist.ac.kr*

<sup>b</sup> *Nano Packaging and Interconnects Laboratory (NPIL), Department of Materials Science and Engineering, Korea Advanced Institute of Science and Technology (KAIST), Daejeon 305-701, Republic of Korea. Fax: 82 42 350 3310; Tel: 82 42 350 3335; E-mail: kwpaik@kaist.ac.kr*

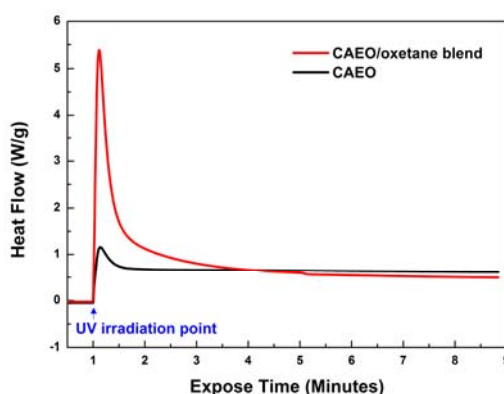

**Fig. S1** Photo DSC exothermic curves of CAEO/oxetane blend and CAEO. The CAEO/oxetane blend showed faster photo-cationic polymerization behavior compared to that of the CAEO.

The Photo DSC of the CAEO/oxetane blend was measured to verify faster photo-cationic polymerization behavior of the blend compared to that of the CAEO. (**Fig. S1**) The CAEO has very small exothermic energy (14.33 J/g) in the early stage of irradiation, thereby lasting for a long period of irradiation during photo-cationic polymerization. In the case of the CAEO/oxetane blend, the exothermic energy (114.3J/g) in the early stage of irradiation was much larger than that of the CAEO. This indicates faster photo-cationic polymerization of the CAEO/oxetane blend than that of the CAEO. This is due to the cross-linking effects of the

oxetane monomer with low molecular weight as well as the high mobility of the cycloaliphatic epoxy groups resulting from lower viscosity of the CAEO/oxetane blend (2730 mPa·s at 25 °C) compared to that of the CAEO (43750 mPa·s at 25 °C).

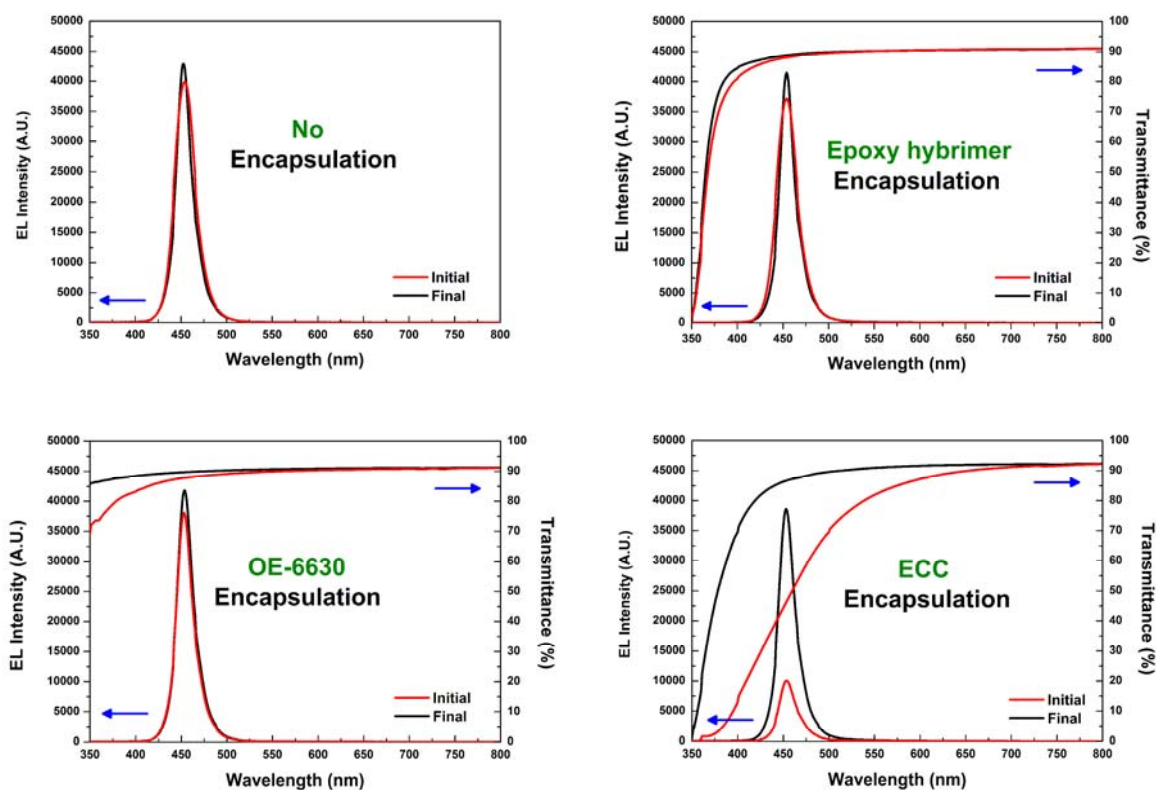

**Fig. S2** EL spectra of the blue LED encapsulated by UV-curable epoxy hybrimer, OE-6630, and ECC before/after thermal aging at 120 °C for 1008 hours in air.

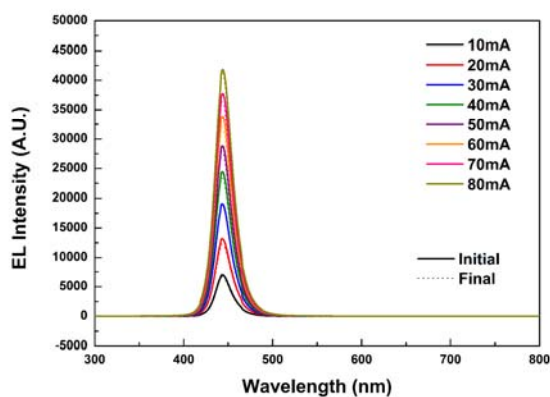

**Fig. S3** EL spectra of the blue LED encapsulated by UV-curable epoxy hybrimer as a function of applied current before/after blue light aging for 24 hours.
